# Supplementary material for: A circular ferrofluid driven microchip for rapid polymerase chain reaction
Source: Royal Society of Chemistry journal article supplement (doi:10.1039/b700575j), 2007-01-01
Supplement: b700575j.pdf [file b700575j.pdf]

# A circular ferrofluid driven microchip for rapid polymerase chain reaction

Y. Sun<sup>a</sup>, Y. C. Kwok<sup>a</sup> and N. T. Nguyen<sup>\*b</sup>

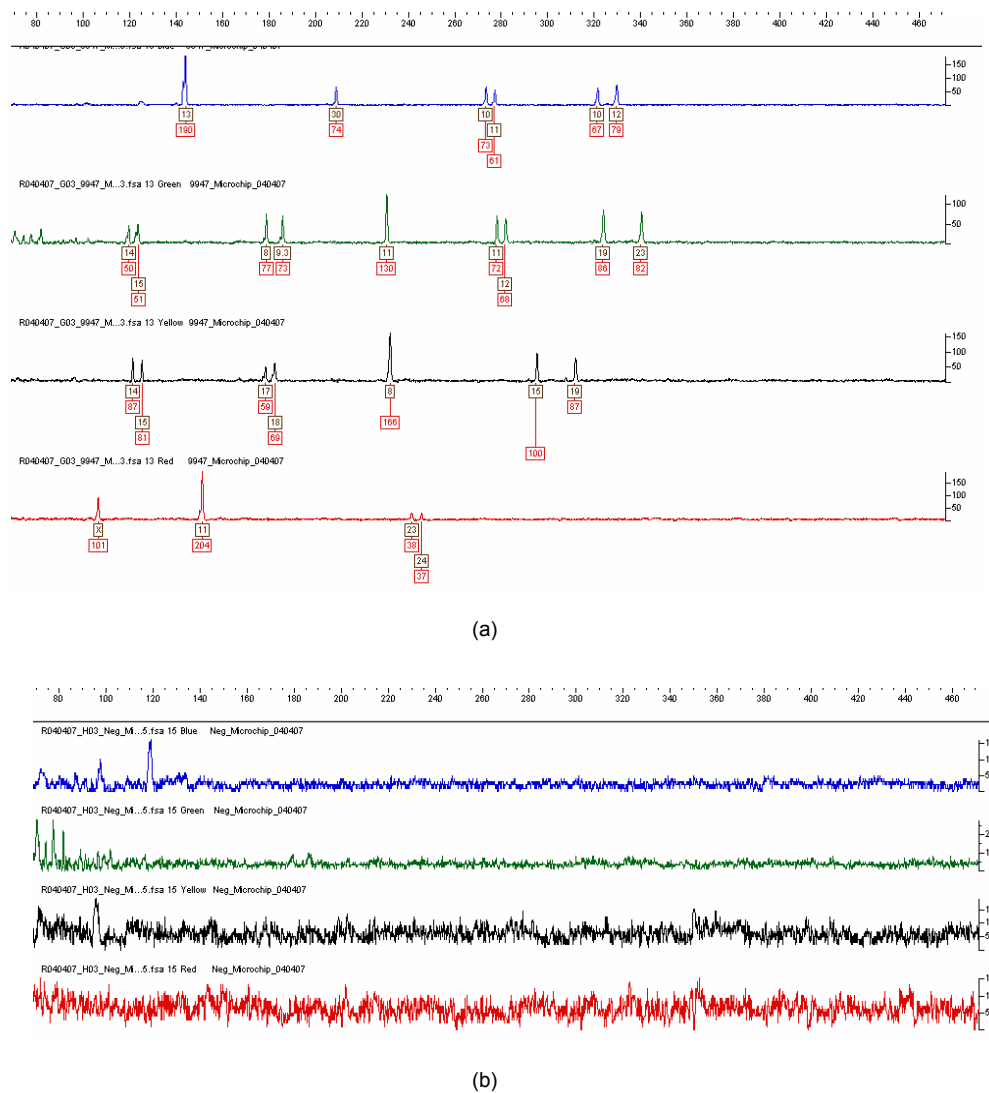

**Fig. 7** Electropherograms of (a) 9947 and (b) negative control amplified using ferrofluid driven PCR microchip. A total number of 25 cycles was completed in 13 mins with a flow velocity of 2 mm/s and cycle rate of 31.4 sec/cycle. Four fluorescent dyes (6-FAM, VIC, NED, and PET dyes) were used to label DNA fragments. All STR loci included in the Applied Biosystems Identifier® STR analysis kit are co-amplified in a single PCR and analyzed simultaneously in a single capillary electrophoresis injection with ABI 3100 PRISM DNA analyzer. The separation was performed under an electric field strength of 83.3 V/cm with an effective separation length of 36 cm for 20 min. STR loci D8S1179, D21S11, D7S820, and CSF1PO are depicted in blue; D3S1358, TH01, D13S317, D16S539, and D2S1338 are represented in green; D19S433, vWA, TPOX, and D18S51 are shown in black; Amelogenin, D5S818 and FGA are depicted in red.
